# Supplementary material for: Effects of hydroxyl group variations on a flavonoid backbone toward modulation of metal-free and metal-induced amyloid-β aggregation
Source: Royal Society of Chemistry journal article supplement (doi:10.1039/c5qi00219b), 2016-01-01
Supplement: c5qi00219b1.pdf [file c5qi00219b1.pdf]

Supporting Information for:

**Effects of hydroxyl group variations on a flavonoid backbone toward modulation of metal-free and metal-induced amyloid- $\beta$  aggregation**

Hyuck Jin Lee,<sup>a,b</sup> Richard A. Kerr,<sup>b</sup> Kyle Korshavn,<sup>b</sup> Jeeyeon Lee,<sup>a</sup> Juhye Kang,<sup>a</sup> Ayyalusamy Ramamoorthy,<sup>b,c,\*</sup> Brandon T. Ruotolo,<sup>b,\*</sup> and Mi Hee Lim<sup>a,\*</sup>

<sup>a</sup> Department of Chemistry, Ulsan National Institute of Science and Technology (UNIST), Ulsan 44919, Korea

<sup>b</sup> Department of Chemistry and <sup>c</sup>Biophysics, University of Michigan, Ann Arbor, Michigan 48109, United States

\* To whom correspondence should be addressed: [mhlim@unist.ac.kr](mailto:mhlim@unist.ac.kr), [bruotolo@umich.edu](mailto:bruotolo@umich.edu), and [ramamoor@umich.edu](mailto:ramamoor@umich.edu).

**List of Figures and Tables**

- |                 |                                                                                                                                           |
|-----------------|-------------------------------------------------------------------------------------------------------------------------------------------|
| <b>Fig. S1</b>  | Interaction of quercetin, galagin or luteolin with <sup>15</sup> N-labeled A $\beta$ <sub>40</sub> , monitored by 2D-SOFAST-HMQC NMR.     |
| <b>Fig. S2</b>  | Mass spectrometric analysis of luteolin- and quercetin-bound A $\beta$ <sub>40</sub> monomers in both the absence and presence of Cu(II). |
| <b>Fig. S3</b>  | Mass spectrometric analysis of flavonoid-bound A $\beta$ <sub>40</sub> dimers.                                                            |
| <b>Table S1</b> | <i>K</i> <sub>d</sub> analysis of flavonoid-bound A $\beta$ <sub>40</sub> in the absence of Cu(II).                                       |
| <b>Table S2</b> | Collision cross section data of all extracted ion mobility arrival times for the observed 4 <sup>+</sup> monomer species.                 |

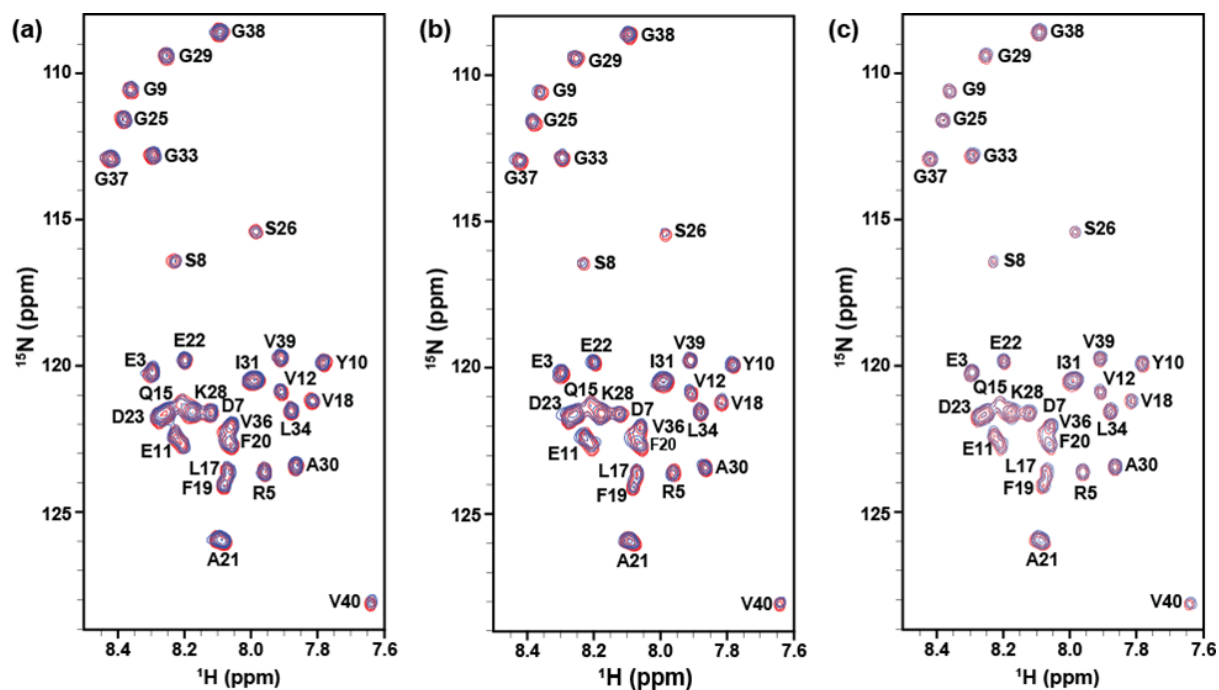

**Fig. S1** Interaction of quercetin, galangin or luteolin with  $^{15}\text{N}$ -labeled  $\text{A}\beta_{40}$ , monitored by 2D-SOFAST-HMQC NMR. Spectra were recorded as (a) quercetin, (b) galangin, or (c) luteolin was titrated into a solution of  $^{15}\text{N}$ -labeled  $\text{A}\beta_{40}$  from 0 (red spectra) and 10 (blue spectra) equiv of flavonoids. Conditions:  $[\text{A}\beta_{40}] = 80 \mu\text{M}$ ;  $[\text{flavonoids}] = 0\text{-}800 \mu\text{M}$ ; 20 mM  $\text{PO}_4$ , pH 7.4, 50 mM NaCl; 7%  $\text{D}_2\text{O}$  (v/v); 10 °C.

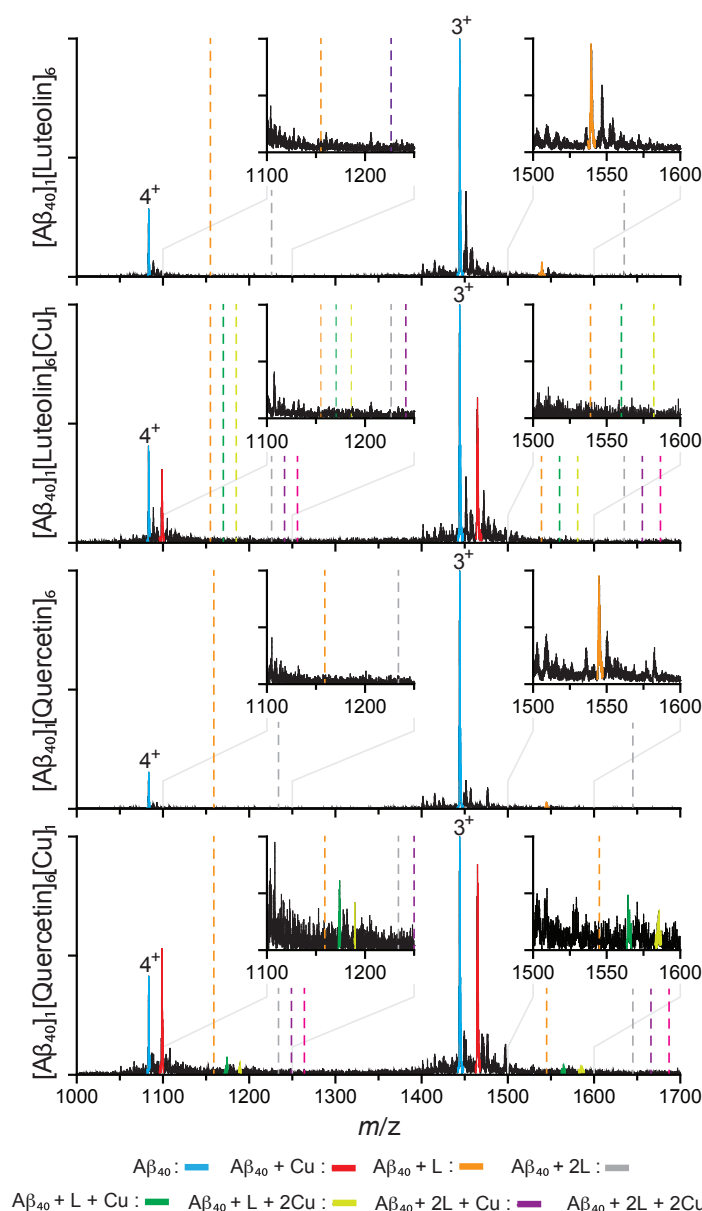

**Fig. S2** Mass spectrometric analysis of luteolin- and quercetin-bound A $\beta_{40}$  monomers in both the absence and presence of Cu(II). Whilst small molecules are expected to be observed in complex with both the 3<sup>+</sup> and 4<sup>+</sup> peptide species,<sup>1,2</sup> luteolin and quercetin are shown to bind to only the 3<sup>+</sup> peptide in the absence of Cu(II).<sup>1,2</sup> 4<sup>+</sup> species binding is indicated in the samples containing a source of Cu(II). Such differences may be explained by poor binding levels of these small molecules to A $\beta$  peptides in the absence of Cu(II). The dashed lines represent the expected binding location of the noted species based on theoretical average  $m/z$  values.

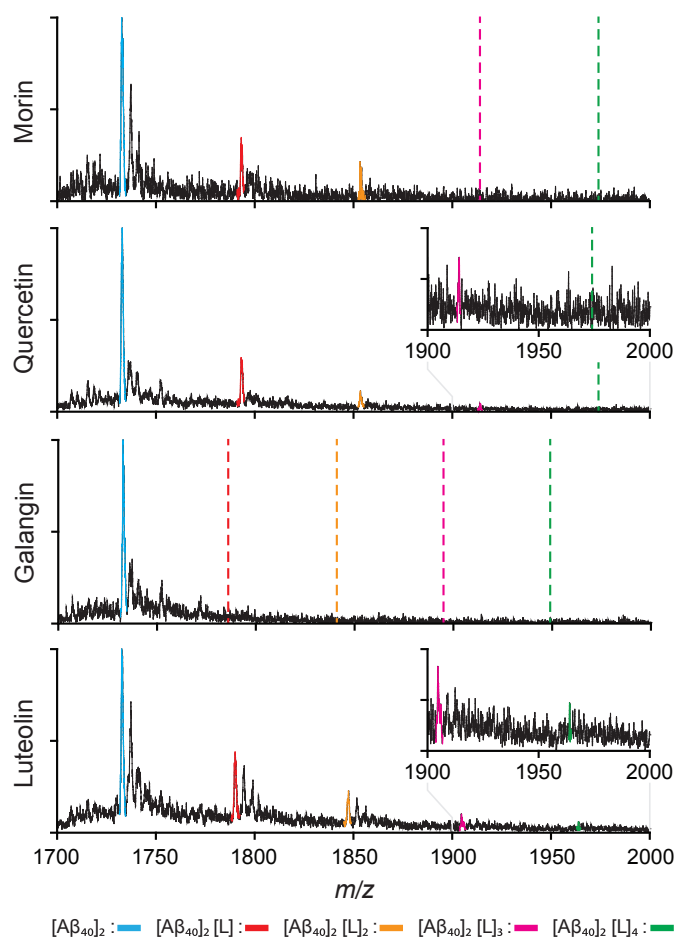

**Fig. S3** Mass spectrometric analysis of flavonoid-bound  $A\beta_{40}$  dimers. Mass analysis of the dimeric metal free  $A\beta_{40}$  ( $5^+$ ) in the presence of each the natural products support that whilst quercetin and luteolin are capable of binding the monomeric species, morin binds to the peptide *via* a site comprised of a surface only present in oligomeric  $A\beta$ . The dashed lines represent the expected binding location of the noted species based on theoretical average  $m/z$  values.

**Table S1**  $K_d$  analysis of flavonoid-bound  $A\beta_{40}$  in the absence of Cu(II).

|                                       | Dissociation Constant ( $\mu$ M) |     |         |
|---------------------------------------|----------------------------------|-----|---------|
| $[A\beta_{40}][\text{Luteolin}]$      | 9128.58                          | +/- | 6526.54 |
| $[A\beta_{40}]_2[\text{Luteolin}]$    | 429.99                           | +/- | 127.48  |
| ---                                   | ---                              | --- | ---     |
| $[A\beta_{40}]_2[\text{Morin}]$       | 360.17                           | +/- | 146.57  |
| ---                                   | ---                              | --- | ---     |
| $[A\beta_{40}][\text{Quercetin}]$     | 8755.75                          | +/- | 1368.39 |
| $[A\beta_{40}]_2[\text{Quercetin}]$   | 558.97                           | +/- | 298.35  |
| $[A\beta_{40}]_2[\text{Quercetin}]_2$ | 385.71                           | +/- | 195.13  |

Values were calculated using previously published methods.<sup>3,4</sup> Conditions:  $[A\beta] = 20 \mu\text{M}$ ;  $[\text{Cu(II)}] = 20 \mu\text{M}$ ;  $[\text{compound}] = 120 \mu\text{M}$ . Errors shown represent single standard deviations.

**Table S2** Collision cross section data of all extracted ion mobility arrival times for the observed 4<sup>+</sup> monomer species.

|                                                           | Conformational Species (Å <sup>2</sup> ) |                   |                  |
|-----------------------------------------------------------|------------------------------------------|-------------------|------------------|
|                                                           | 1                                        | 2                 | 3                |
| [Aβ <sub>40</sub> ]                                       | 667.33 +/- 29.05                         | 726.42* +/- 29.05 | -                |
| [Aβ <sub>40</sub> ][Cu]                                   | 669.80* +/- 27.44                        | 735.95 +/- 27.59  | 801.50 +/- 31.17 |
| ---                                                       | ---                                      | ---               | ---              |
| [Aβ <sub>40</sub> ][Morin][Cu]                            | 692.08* +/- 30.12                        | 751.54 +/- 26.67  | -                |
| [Aβ <sub>40</sub> ][Morin] <sub>2</sub> [Cu] <sub>2</sub> | 693.51* +/- 27.15                        | 770.23 +/- 28.03  | 811.85 +/- 30.47 |
| ---                                                       | ---                                      | ---               | ---              |
| [Aβ <sub>40</sub> ][Quercetin][Cu]                        | 675.98* +/- 31.07                        | 768.68 +/- 29.96  | 812.63 +/- 27.66 |
| [Aβ <sub>40</sub> ][Quercetin][Cu] <sub>2</sub>           | 681.41* +/- 32.82                        | 745.36 +/- 29.33  | 779.71 +/- 34.79 |

Collision Cross Section values calculated for 4<sup>+</sup> morin- and quercetin-bound Aβ<sub>40</sub> species arrival times extracted from the full width half maximum (FWHM). Errors represent least square analysis encapsulating inherent calibrant error from drift tube measurements (3%),<sup>5</sup> calibration curve error, and two times the replicate standard deviation error. The dominant conformational species for each extracted data set is denoted with the suffix \*.

## References

- 1 S.-J. Hyung, A. S. DeToma, J. R. Brender, S. Lee, S. Vivekanandan, A. Kochi, J.-S. Choi, A. Ramamoorthy, B. T. Ruotolo and M. H. Lim, *Proc. Natl. Acad. Sci. U. S. A.*, 2013, **110**, 3743.
- 2 M. W. Beck, S. B. Oh, R. A. Kerr, H. J. Lee, S. H. Kim, S. Kim, M. Jang, B. T. Ruotolo, J. Y. Lee and M. H. Lim, *Chem. Sci.*, 2015, **6**, 1879.
- 3 M. T. Soper, A. S. DeToma, S.-J. Hyung, M. H. Lim and B. T. Ruotolo, *Phys. Chem. Chem. Phys.*, 2013, **15**, 8952.
- 4 W. Wang, E. N. Kitova and J. S. Klassen, *Anal. Chem.*, 2003, **75**, 4945.
- 5 M. F. Bush, Z. Hall, K. Giles, J. Hoyes, C. V. Robinson and B. T. Ruotolo, *Anal. Chem.*, 2010, **82**, 9557.
